# Supplementary figures and images for: Characterization of Retinitis Pigmentosa Using Fluorescence Lifetime Imaging Ophthalmoscopy (FLIO)
Source: PubMed Central journal article supplement — Transl Vis Sci Technol. 2018 Jun 22;7(3):20. doi: 10.1167/tvst.7.3.20 (PMC6016507; doi:10.1167/tvst.7.3.20), 2018-06-22

| RP # | OD                                                                                  | OS                                                                                   |
|------|-------------------------------------------------------------------------------------|--------------------------------------------------------------------------------------|
| #1   | 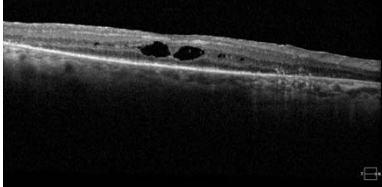   |    |
| #2   |    |    |
| #3   |    |    |
| #4   |   |   |
| #5   |  |  |
| #6   |  |  |
| #7   |  |  |
| #8   |  |  |
| #9   |  |  |

|     |                                                                                     |                                                                                      |
|-----|-------------------------------------------------------------------------------------|--------------------------------------------------------------------------------------|
| #10 | 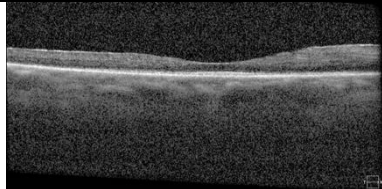   |    |
| #11 |    |    |
| #12 |    |    |
| #13 |    |    |
| #14 |   |   |
| #15 |  |  |
| #16 |  |  |
| #17 |  |  |
| #18 |  |  |
| #19 |  |  |

|     |                                                                                     |                                                                                      |
|-----|-------------------------------------------------------------------------------------|--------------------------------------------------------------------------------------|
| #20 | 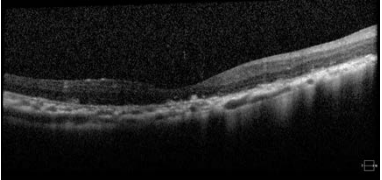   |    |
| #21 |    |    |
| #22 |    |    |
| #23 |    |    |
| #24 |   |   |
| #25 |  |  |
| #26 |  |  |
| #27 |  |  |
| #28 |  |  |
| #29 |  |  |

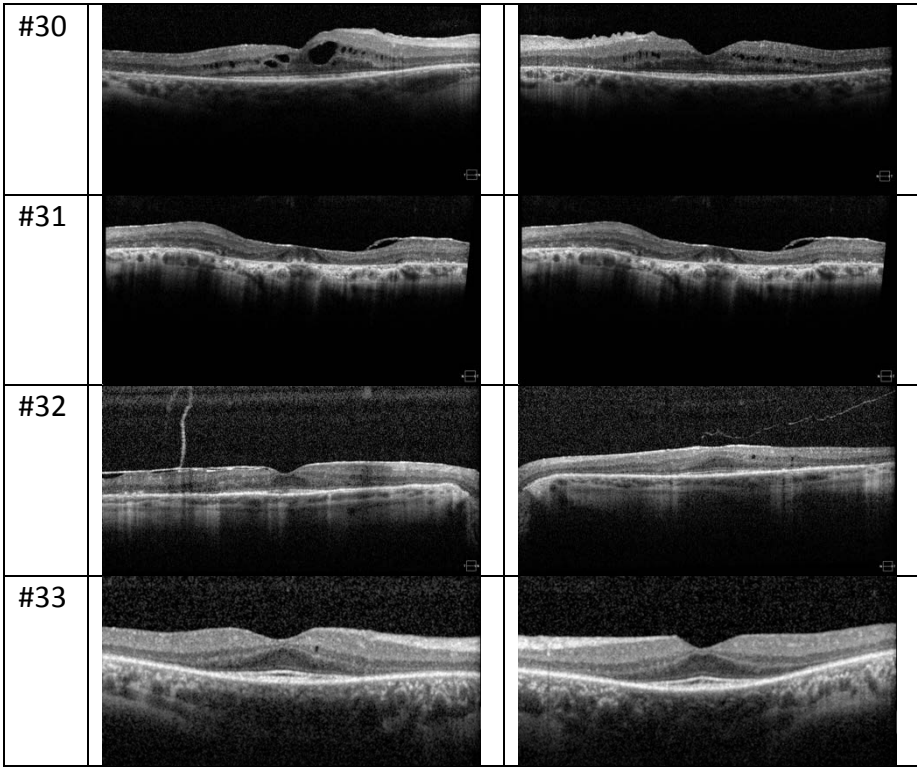

**Supplementary Figure 1:** OCT images of enrolled subjects.

Supplement: tvst-07-03-15_s01.pdf [file tvst-07-03-15_s01.pdf]
